# Supplementary material for: From inert to active: a cocktail-like mediation of an Ag/Ni mixture for electrocatalytic ammonia oxidation reaction
Source: Royal Society of Chemistry journal article supplement (doi:10.1039/d2cc03764e), 2022-01-01
Supplement: d2cc03764e1.pdf [file d2cc03764e1.pdf]

## Electronic Supplementary Information (ESI)

### **From inert to active: a cocktail-like mediation of Ag/Ni mixture for electrocatalytic ammonia oxidation reaction**

Yongzhen Jin,<sup>a,b,c</sup> Xin Chen<sup>b,c</sup> and Jianhui Wang\*<sup>a,b,c</sup>

<sup>a</sup> *School of Materials Science and Engineering, Zhejiang University, 38 Zheda Road, Hangzhou 310027, China.*

<sup>b</sup> *Key Laboratory of 3D Micro/Nano Fabrication and Characterization of Zhejiang Province, School of Engineering, Westlake University, 18 Shilongshan Road, Hangzhou 310024, China.*

<sup>c</sup> *Institute of Advanced Technology, Westlake Institute for Advanced Study, 18 shilongshan Road, Hangzhou 310024, China.*

# 1. Experimental Section

## 1.1 Materials

Ag powder (MACKLIN, 99.5 %); Ni powder (MACKLIN, 99.9 %); NaOH (MACKLIN,  $\geq 99.8$  %),  $\text{NH}_4\text{Cl}$  (MACKLIN,  $\geq 99.5\%$ ); Nafion (Canrd,  $> 99.9\%$ ), Isopropanol (MACKLIN,  $\geq 99.5$  %), Carbon black (Canrd).

## 1.2 Sample preparation

The Ag/Ni samples with different molar ratio (4:1, 1:1, 1:2, 1:3, 1:13) were prepared by hand-milling the pristine Ag and Ni powders (~8 mg) in a mortar for 15 minutes. The samples with the Ag:Ni molar ratio from 1:3 to 1:1 show a very similar electrocatalytic performance, all of which are much superior to those sample (4:1 and 1:13). Therefore, we selected the Ag/Ni sample (1:2) for a systematic study.

The Ag/Ni ink was prepared by dispersing 8 mg Ag/Ni sample and 4 mg carbon powders in 1.0 mL solution of water (680  $\mu\text{L}$ ), isopropanol (300  $\mu\text{L}$ ), and nafion (20  $\mu\text{L}$ ) followed by ultrasonication for 5 minutes. The Ag and Ni inks were prepared in the same way.

The catalyst inks were coated on a glassy carbon electrode (sample loading, 0.5 mg  $\text{cm}^{-2}$ ) or Ni foam (sample loading, 1.0 mg  $\text{cm}^{-2}$ ) or Au deposited PTFE membrane electrode (sample loading, 1.0 mg  $\text{cm}^{-2}$ ). The glassy carbon electrode was used for cyclic voltammograms (CV) test. The Ni foam electrode was used to test the long-time stability and faradic efficiencies of reaction products. And the Au deposited PTFE membrane electrode was used for in-situ DEMS measurement.

## 1.3 Material characterizations

X-ray powder diffraction (XRD) patterns were obtained on a Bruker D8 Advance powder diffractometer, using Cu  $K\alpha$  ( $\lambda = 1.5418 \text{ \AA}$ ) as the radiation source. The scanning electron microscopy (SEM) images were taken on a Hitachi Regulus 8230. The images of transmission electron microscopy (TEM) and high resolution

transmission electron microscopy (HRTEM) as well as the elemental mapping were obtained by using a Talos F200X G2 electron microscope (Thermo Fisher Scientific) operated at 200 kV. X-ray photoelectron spectroscopy (XPS) measurements were performed on a Thermo Fisher ESCALAB Xi+. The binding energies were calibrated using C 1s peak at 284.8 eV as standard. Ion chromatography (Thermo Fisher ICS 6000) was applied to identify the liquid products in the electrolyte.

#### **1.4 Electrochemical measurements**

Electrochemical measurements were measured in a three-electrode cell on a workstation (CHI660E, Shanghai, China) using a carbon rod as the counter electrode, a saturated Hg/HgO as the reference electrode and the glassy carbon loaded with catalysts as the working electrode. Before the measurement, the electrolyte (1.5 M NaOH or 1.5 M NaOH + 0.5 M NH<sub>4</sub>Cl) was bubbled with an Argon gas flow for 20 min to remove air. CV tests were performed at a scan rate of 25 mV s<sup>-1</sup>. The electrochemically active surface areas (ECSA) of the electrocatalysts were evaluated by the equation of  $ECSA = R_f / m_{\text{loading}}$ . The rough factor  $R_f$  values were determined by dividing the double layer capacitance ( $C_{dl}$ ) with the value of 0.060 mF cm<sup>-2</sup>. The  $C_{dl}$  was half of the liner slope, which was obtained by plotting the  $\Delta j = j_a - j_c$  at -0.15 V vs. Hg/HgO against the scan rate (10, 30, 50, 70, 90 mV s<sup>-1</sup>, respectively)

#### **1.5 In-situ DEMS analysis**

Differential electrochemical mass spectrometry (DEMS, Linglu Shanghai) measurements were carried out for in-situ analysis of gas products during EAOR, such as N<sub>2</sub> (28 m/z), O<sub>2</sub> (32 m/z), NO (30 m/z), NO<sub>2</sub> (46 m/z) and N<sub>2</sub>O (44 m/z). The working electrode was the Ag/Ni on Au deposited PTFE membrane (50 μm thickness, 20 nm pore) that only allows the penetration of volatile and hydrophobic species.

#### **1.6 Collection of gas products by drainage method**

A sealed H-shaped electrolytic cell was used for collection of gas products during a two hours' chronoamperometry (CA) test at 0.7 V vs. Hg/HgO, where the Ag/Ni on Ni foam, Hg/HgO electrode, and the carbon rod were used as the working electrode,

the reference electrode, and the counter electrode, respectively.

### 1.7 Calculation of the faradic efficiency

The faradic efficiency of H<sub>2</sub> was calculated according to the equation (1):

$$\text{H}_2 \text{ faradic efficiency} = \frac{2 \times V_{\text{H}_2} \times F}{V_m \times Q} \times 100\% \quad (1)$$

Where  $V_{\text{H}_2}$  is the volume of H<sub>2</sub> collected by the drainage method;  $V_m$  is the molar volume of the gas (22.4 L mol<sup>-1</sup>);  $F$  is the faraday constant (96485 C mol<sup>-1</sup>),  $Q$  is the total charge consumed in the measurement.

The faradic efficiency of N<sub>2</sub> was calculated according to the equation (2):

$$\text{N}_2 \text{ faradic efficiency} = \frac{6 \times V_{\text{N}_2} \times F}{V_m \times Q} \times 100\% \quad (2)$$

Where  $V_{\text{N}_2}$  is the volume of N<sub>2</sub> collected by the drainage method;  $V_m$  is the molar volume of the gas (22.4 L mol<sup>-1</sup>);  $F$  is the faraday constant (96485 C mol<sup>-1</sup>),  $Q$  is the total charge consumed in the measurement.

The faradic efficiencies of NO<sub>2</sub><sup>-</sup> and NO<sub>3</sub><sup>-</sup> were calculated according to the equation (3) and (4), respectively:

$$\text{NO}_2^- \text{ faradic efficiency} = \frac{6 \times c_{\text{NO}_2^-} \times V \times F}{M \times Q} \times 100\% \quad (3)$$

$$\text{NO}_3^- \text{ faradic efficiency} = \frac{8 \times c_{\text{NO}_3^-} \times V \times F}{M \times Q} \times 100\% \quad (4)$$

Where  $c_{\text{NO}_2^-}$  and  $c_{\text{NO}_3^-}$  are the concentration of NO<sub>2</sub><sup>-</sup> and NO<sub>3</sub><sup>-</sup> ion produced in the electrolyte determined by ion chromatography, respectively;  $V$  is the volume of electrolyte (30 mL);  $M$  is the molar mass of NO<sub>2</sub><sup>-</sup> and NO<sub>3</sub><sup>-</sup>;  $F$  is the faradic constant (96485 C mol<sup>-1</sup>),  $Q$  is the total charge consumed in the measurement.

## 2. Supplementary Figures

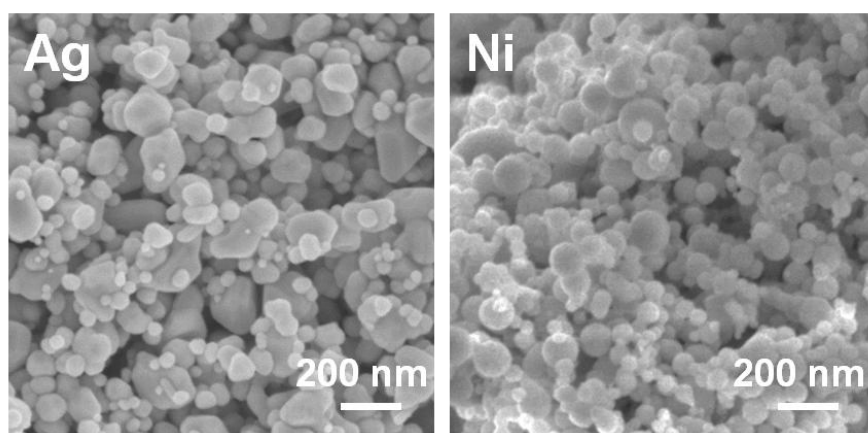

**Fig. S1** SEM images of pristine Ag and Ni powders.

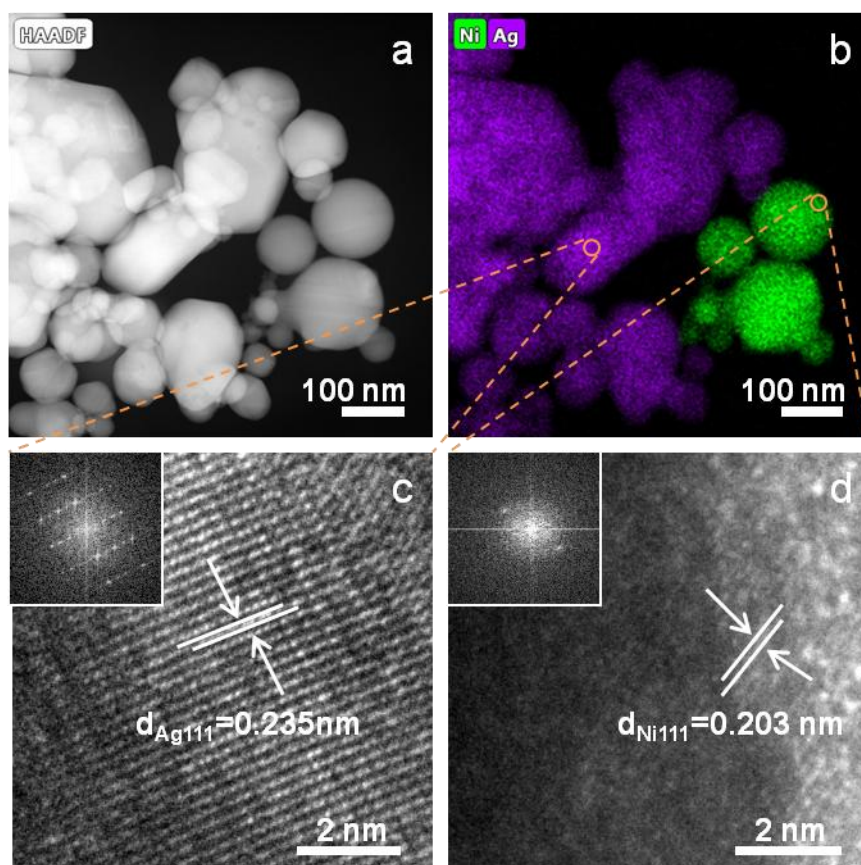

**Fig. S2** a) The high-angle angular dark-field (HAADF) image and b) element mapping image of the Ag/Ni sample. HRTEM images of Ag c) and Ni d) particle in the Ag/Ni sample. The insets display the derived FFT patterns. The lattice spacing of 0.235 nm and 0.203 nm correspond to the character of Ag (111) and Ni (111), respectively.

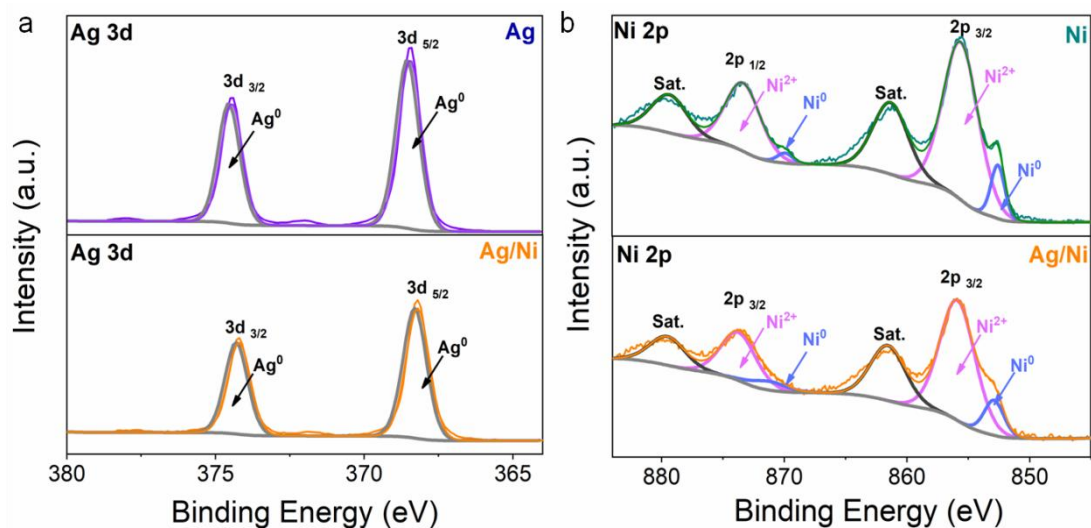

**Fig. S3** XPS spectra. a) Ag 3d of pristine Ag and Ag/Ni mixture. b) Ni 2p of pristine Ni and Ag/Ni mixture.

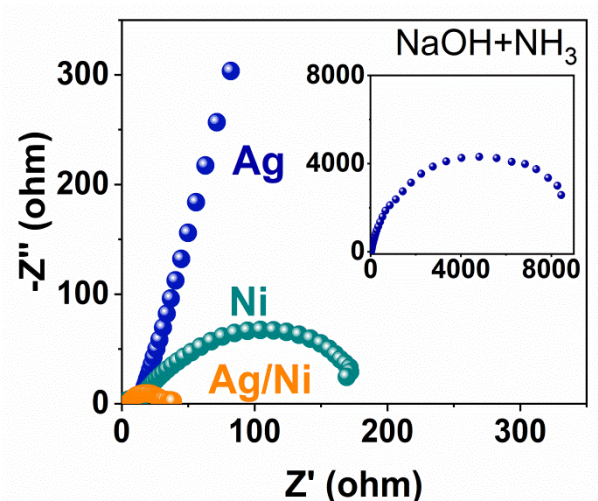

**Fig. S4** Electrochemical impedance spectra (EIS) of Ag/Ni, Ag and Ni samples coated on a glassy carbon electrode tested at 0.6 V (vs. Hg/HgO).

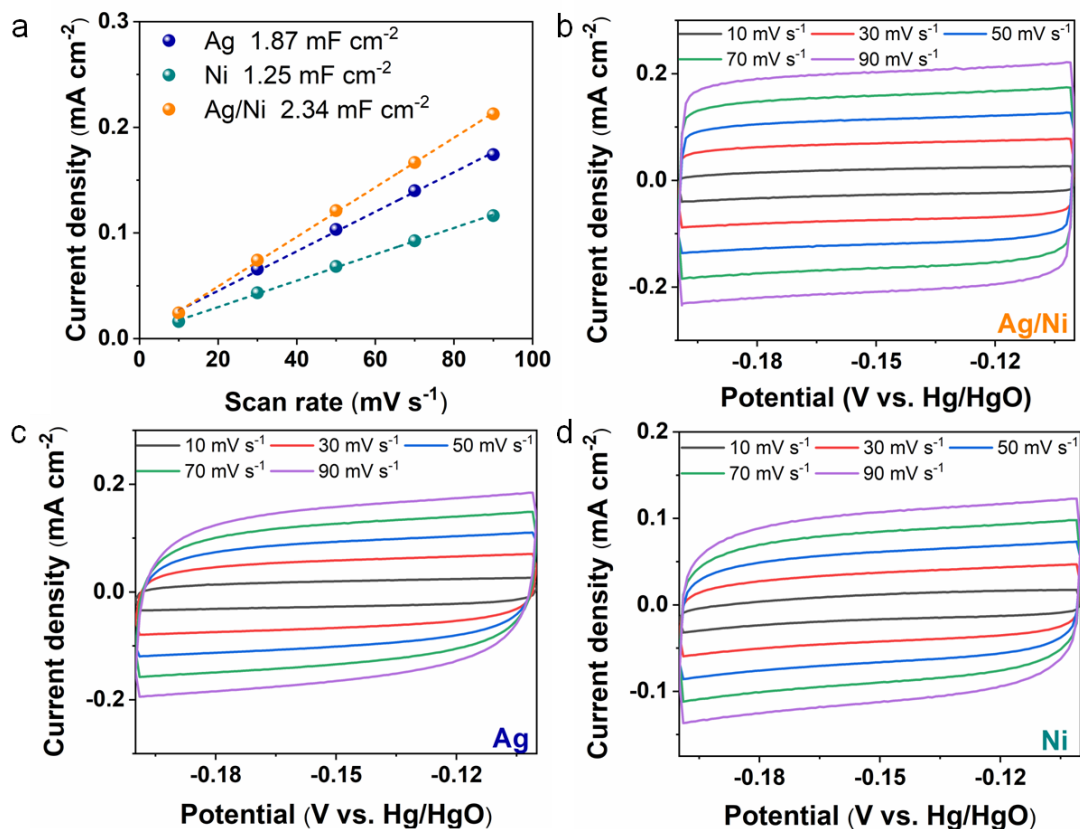

**Fig. S5** a) Plots of the current density versus the scan rate to determine the double layer capacitance ( $C_{dl}$ ) of the Ag/Ni, Ag and Ni catalysts. b-d) CV curves of the Ag/Ni (b), Ag (c), Ni (d) in the electrolytes of 1.5 M NaOH + 0.5 M NH<sub>3</sub> at different scan rates.

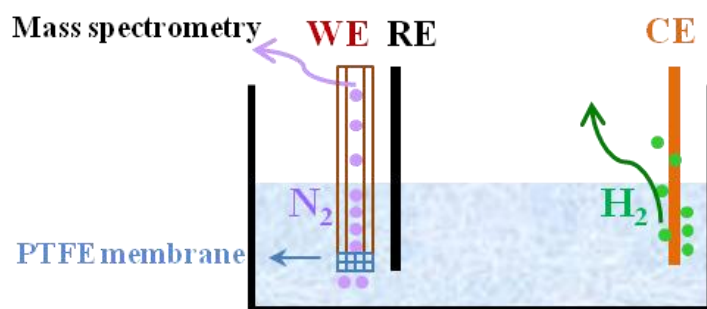

**Fig. S6** Schematic diagram of the DEMS measurement. The anodic gas products are exclusively detected by DEMS.

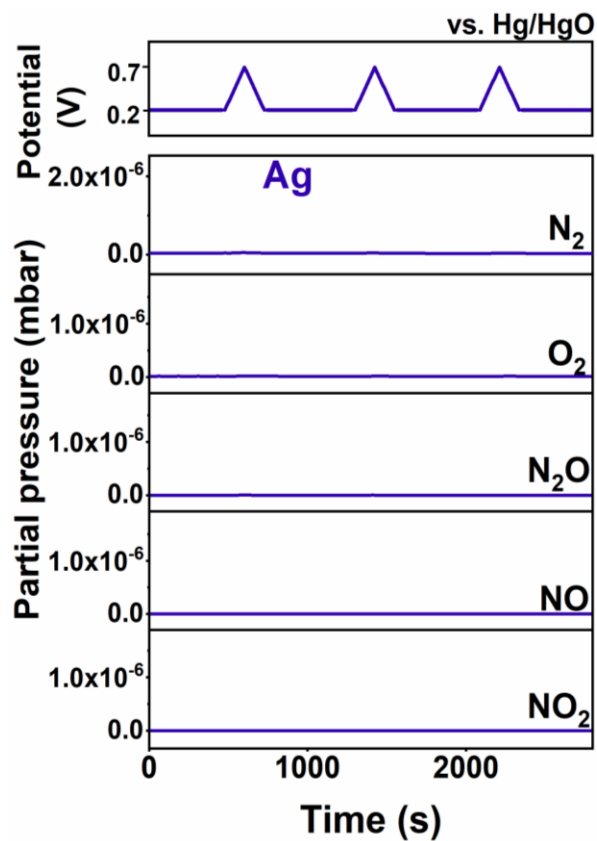

**Fig. S7** DEMS signals during the CV scans of pristine Ag in the electrolyte of 1.5 M NaOH + 0.5 M NH<sub>3</sub>.

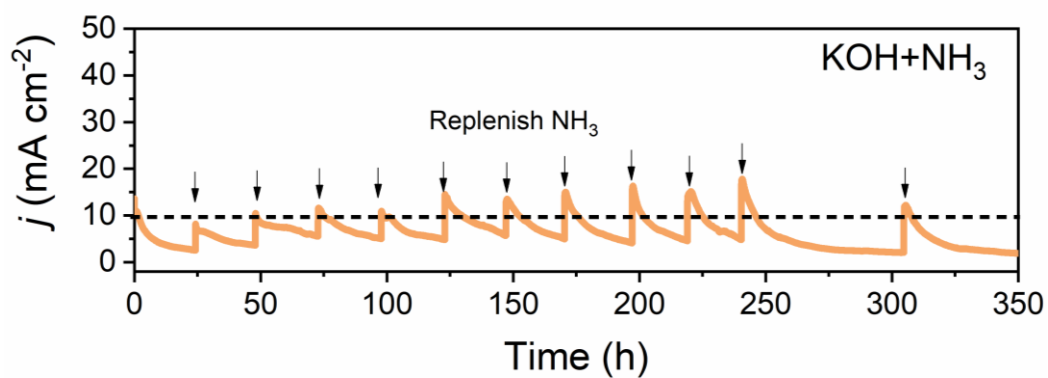

**Fig. S8** Chronoamperometric responses of the Ag/Ni catalyst on a Ni foam electrode at 0.55 V (vs. Hg/HgO).



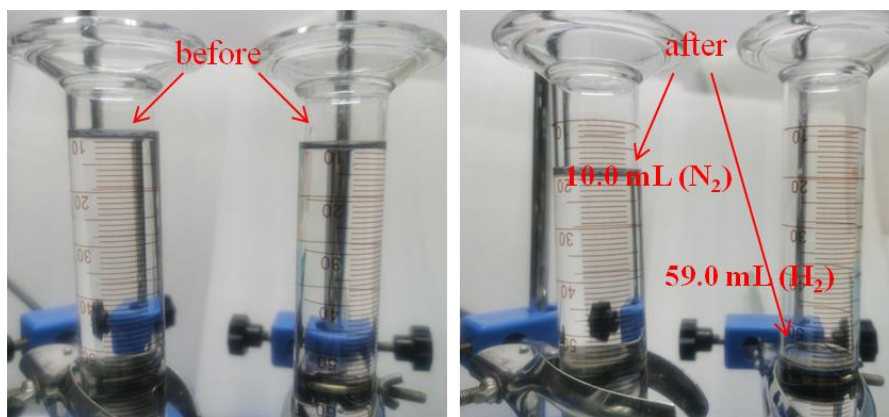

**Fig. S9** Collection of the cathodic ( $\text{H}_2$ ) and anodic ( $\text{N}_2$ ) gas products of the Ag/Ni catalyzed EAOR by the drainage method. The gas products were generated during a 2 hours' CA test at 0.7 V (vs. Hg/HgO).

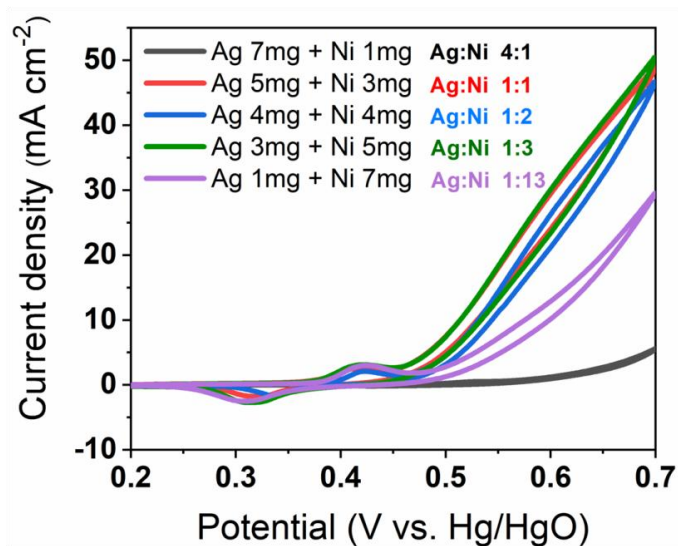

**Fig. S10** CV curves of Ag, Ni and Ag/Ni on the glassy carbon electrode normalized by the geometric area.

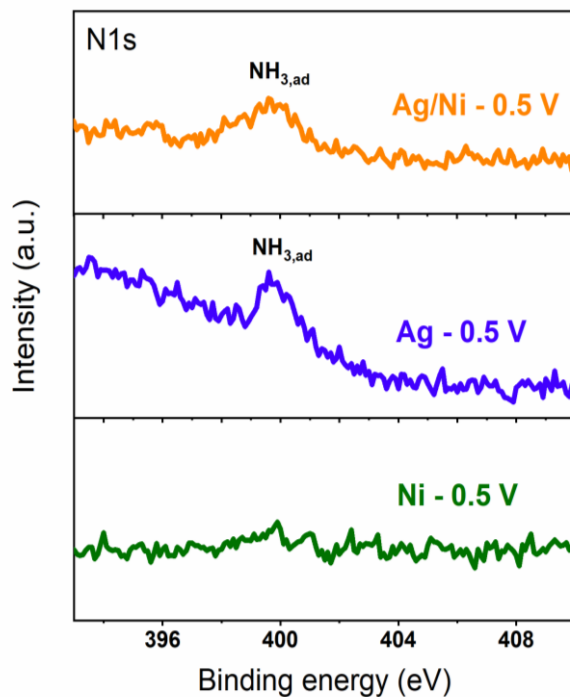

**Fig. S11** N1s XPS spectra of Ag/Ni, Ag and Ni samples after a CA test. The samples were tested in the electrolyte of 1.5 M NaOH + 0.5 M NH<sub>3</sub> at 0.5 V (vs. Hg/HgO) followed by 20 times' rinses with deionized water and a dry at 60 °C for 5 hours. Clearly, significant N1s signal at 400 eV can be found on the Ag and Ag/Ni samples while no N1s signal on the Ni sample, which supports the absorption of NH<sub>3</sub>-species on the Ag.

### 3. Supplementary Tables

**Table S1. Electrochemical active surface area of various samples.**

| Sample                                   | Ag/Ni | Ag    | Ni    |
|------------------------------------------|-------|-------|-------|
| $C_{dl}$ (mF cm <sup>-2</sup> )          | 2.34  | 1.87  | 1.25  |
| $R_f$                                    | 39.00 | 31.17 | 20.83 |
| ECSA (cm <sup>2</sup> mg <sup>-1</sup> ) | 78.00 | 62.34 | 41.66 |

**Table S2. Faradic efficiencies of N<sub>2</sub> and H<sub>2</sub> in the Ag/Ni catalyzed EAOR.**

| Sample | Total charge (C) | V (N <sub>2</sub> ) (mL) | V (H <sub>2</sub> ) (mL) | Faradic efficiency (N <sub>2</sub> ) (%) | Faradic efficiency (H <sub>2</sub> ) (%) |
|--------|------------------|--------------------------|--------------------------|------------------------------------------|------------------------------------------|
| Ag/Ni  | 432.1            | 10                       | 49                       | 59.8                                     | 97.7                                     |

The gas products of H<sub>2</sub> and N<sub>2</sub> were collected in a sealed H-shaped electrolytic cell at 0.7 V vs. Hg/HgO for two hours.

**Table S3. Faradic efficiencies of NO<sub>2</sub><sup>-</sup> and NO<sub>3</sub><sup>-</sup> in the Ag/Ni catalyzed EAOR.**

| Sample | Total charge (C) | c (NO <sub>2</sub> <sup>-</sup> ) (mg L <sup>-1</sup> ) | c (NO <sub>3</sub> <sup>-</sup> ) (mg L <sup>-1</sup> ) | Faradic efficiency (NO <sub>2</sub> <sup>-</sup> ) (%) | Faradic efficiency (NO <sub>3</sub> <sup>-</sup> ) (%) |
|--------|------------------|---------------------------------------------------------|---------------------------------------------------------|--------------------------------------------------------|--------------------------------------------------------|
| Ag/Ni  | 430.1            | 19.56                                                   | 372.98                                                  | 1.7                                                    | 32.3                                                   |

The liquid products of NO<sub>2</sub><sup>-</sup> and NO<sub>3</sub><sup>-</sup> were collected at 0.7 V vs. Hg/HgO for two hours.
